# ANESTHESIOLOGY

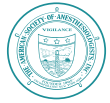

## Functional Breakdown of Cortical Networks: A Tale of Three Anesthetics

Results from three research groups,<sup>1,2,3</sup> with three anesthetics and three research paradigms, suggest a common neural mechanism:

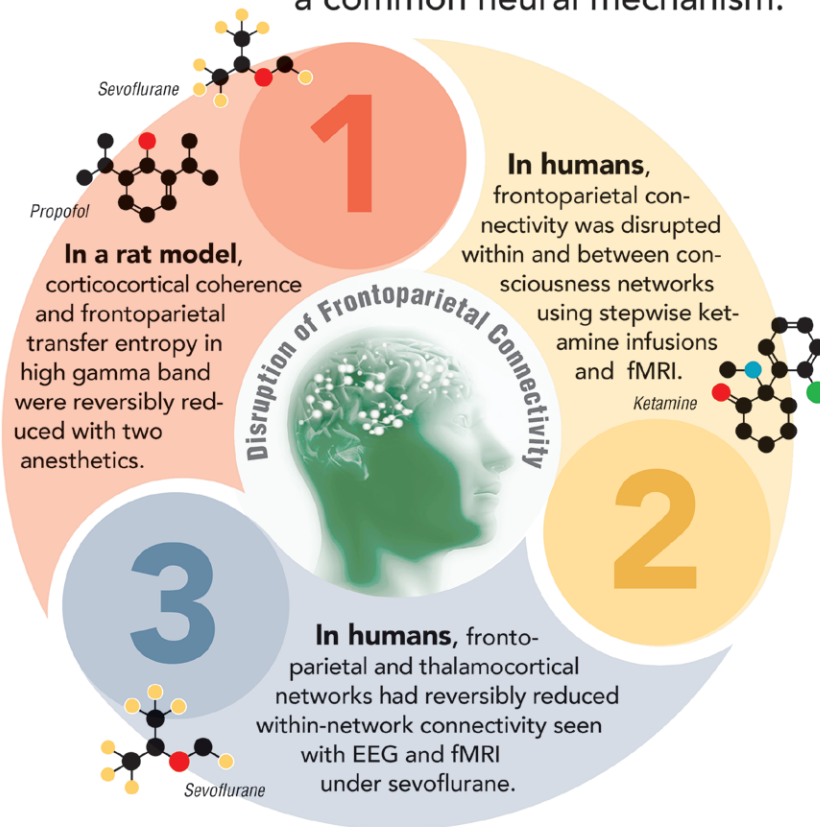

“An ounce of replication is worth a ton of small *P* values.”<sup>4</sup>

EEG=electroencephalograph; fMRI=functional magnetic resonance imaging.

Infographic created by Jonathan P. Wanderer, Vanderbilt University School of Medicine, and James P. Rathmell, Brigham and Women's Health Care/Harvard Medical School. Illustration by Annemarie Johnson, Vivo Visuals. Address correspondence to Dr. Wanderer: jon.wanderer@vanderbilt.edu.

1. Pal D, Silverstein BH, Lee H, Mashour GA: Neural correlates of wakefulness, sleep, and general anesthesia: An experimental study in rat. *ANESTHESIOLOGY* 2016; 125:929-42
2. Bonhomme V, Vanhauzenhuysse A, Demertzi A, Bruno M-A, Jaquet O, Ali Bahr M, Plenevaux A, Boly M, Boveroux P, Soddu A, Brichant JF, Maquet P, Laureys S: Resting-state network-specific breakdown of functional connectivity during ketamine alteration of consciousness in volunteers. *ANESTHESIOLOGY* 2016; 125:873-88
3. Ranft A, Golkowski D, Kiel T, Riedl V, Kohl P, Rohrer G, Pientka J, Berger S, Thul A, Maurer M, Preibisch C, Zimmer C, Mashour GA, Kochs EF, Jordan D, Ilg R: Neural correlates of sevoflurane-induced unconsciousness identified by simultaneous functional magnetic resonance imaging and electroencephalography. *ANESTHESIOLOGY* 2016; 125:861-72
4. Sleight J: Another brick in (some kind of) wall. *ANESTHESIOLOGY* 2016; 125:827-9
